# Supplementary material
Source: HighWire-hosted journal article supplement (http://erj.ersjournals.com/highwire/filestream/113038/field_highwire_adjunct_files/0/AFischer_supplement_material_modified.pdf)
Supplement: AFischer_supplement_material_modified.pdf [file AFischer_supplement_material_modified.pdf]

# **Association of IBD Risk Loci with Sarcoidosis and its Acute and Chronic Subphenotypes**

Annegret Fischer, Michael Nothnagel, Andre Franke, Gunnar Jacobs, Hamid R. Saadati, Karoline Gaede, Philip Rosenstiel, Manfred Schürmann, Joachim Müller-Quernheim, Stefan Schreiber, Sylvia Hofmann

## **Online Data Supplement**

**Table S1: References for SNPs under study.**

| Variant    | Initial publication of association with IBD | Publications replicating association with IBD or reporting associations with other diseases |
|------------|---------------------------------------------|---------------------------------------------------------------------------------------------|
| rs10045431 | [1]                                         | [2-4]                                                                                       |
| rs1004819  | [5]                                         | [6-10]                                                                                      |
| rs10418239 | [11]                                        | -                                                                                           |
| rs1050152  | [12]                                        | [1, 7, 13-16]                                                                               |
| rs10521209 | [17-19]                                     | [20]                                                                                        |
| rs10733113 | [21]                                        | -                                                                                           |
| rs10753575 | [6]                                         | -                                                                                           |
| rs10758669 | [1]                                         | [4, 22]                                                                                     |
| rs10761659 | [23]                                        | [24-25]                                                                                     |
| rs10801047 | [26]                                        | -                                                                                           |
| rs10870077 | [11]                                        | -                                                                                           |
| rs10883365 | [26]                                        | [24-25, 27]                                                                                 |
| rs10889677 | [5]                                         | [6-7, 28-33]                                                                                |
| rs10974944 | [34]                                        | [35]                                                                                        |
| rs10995271 | [1]                                         | -                                                                                           |
| rs11175593 | [1]                                         | [4]                                                                                         |
| rs11205760 | [23]                                        | [24-25]                                                                                     |
| rs11209026 | [5]                                         | [1, 6-9, 23-25, 36-48]                                                                      |
| rs11465804 | [5]                                         | [1, 6, 8, 32-33, 46, 49-52]                                                                 |
| rs11584383 | [1]                                         | [4]                                                                                         |
| rs11617463 | [53]                                        | -                                                                                           |
| rs11747270 | [23]                                        | [1, 25]                                                                                     |
| rs12035082 | [23]                                        | [24-26, 54]                                                                                 |
| rs1248696  | [55]                                        | -                                                                                           |
| rs12529198 | [23]                                        | [1, 4, 25]                                                                                  |
| rs12612347 | [34]                                        | -                                                                                           |
| rs12704036 | [23]                                        | -                                                                                           |
| rs12948909 | [4]                                         | -                                                                                           |
| rs13361189 | [26]                                        | [24-25, 56-57]                                                                              |
| rs1363670  | [23]                                        | [25]                                                                                        |
| rs1456893  | [1]                                         | [4]                                                                                         |
| rs1462651  | [23]                                        | -                                                                                           |
| rs1551398  | [1]                                         | [4]                                                                                         |
| rs1553575  | [20]                                        | -                                                                                           |
| rs1558744  | [6]                                         | -                                                                                           |
| rs17234657 | [23]                                        | [24-26]                                                                                     |
| rs17309827 | [23]                                        | [25]                                                                                        |
| rs1736135  | [1]                                         | -                                                                                           |
| rs17419032 | [23]                                        | [25]                                                                                        |
| rs1793004  | [20]                                        | -                                                                                           |
| rs1931047  | [23]                                        | [26]                                                                                        |

|           |          |                                              |
|-----------|----------|----------------------------------------------|
| rs1992660 | [20]     | -                                            |
| rs1992662 | [20]     | -                                            |
| rs2015070 | [23]     | -                                            |
| rs2076756 | [17-19]  | [20, 53]                                     |
| rs2188962 | [1]      | -                                            |
| rs2228226 | [58]     | -                                            |
| rs224136  | [53]     | [25-26]                                      |
| rs2241880 | [59]     | [1, 24-25, 37, 41-42, 48, 50, 53, 57, 60-66] |
| rs2301436 | [1]      | -                                            |
| rs2476601 | [1]      | [67-77]                                      |
| rs2484676 | [23, 26] | -                                            |
| rs2522057 | [23]     | [78]                                         |
| rs2542151 | [26]     | [1, 24-25]                                   |
| rs2814036 | [23]     | -                                            |
| rs2836753 | [23]     | -                                            |
| rs2836754 | [23, 26] | [54]                                         |
| rs2872507 | [1]      | -                                            |
| rs2925757 | [20]     | -                                            |
| rs3024505 | [34]     | -                                            |
| rs363617  | [23]     | [24]                                         |
| rs3764147 | [1]      | -                                            |
| rs3789243 | [79]     | [80-82]                                      |
| rs3828309 | [1]      | -                                            |
| rs3936503 | [23]     | [24]                                         |
| rs4263839 | [1]      | -                                            |
| rs4266924 | [21]     | -                                            |
| rs4362447 | [23]     | -                                            |
| rs4506508 | [23]     | -                                            |
| rs4613763 | [53]     | [1]                                          |
| rs4821544 | [53]     | [25, 56]                                     |
| rs4871612 | [23]     | [4, 24-25]                                   |
| rs4958847 | [26]     | [24-25, 56-57]                               |
| rs6011040 | [23]     | [25]                                         |
| rs6426833 | [6]      | -                                            |
| rs6601764 | [23]     | -                                            |
| rs6887695 | [23]     | [24-27, 44-45, 47, 83-85]                    |
| rs6908425 | [1, 23]  | [4, 25, 54, 86-87]                           |
| rs6927210 | [23]     | [24]                                         |
| rs6947579 | [20]     | -                                            |
| rs7081330 | [23]     | -                                            |
| rs7134599 | [6]      | -                                            |
| rs744166  | [1, 23]  | [4, 25]                                      |
| rs7547331 | [23]     | -                                            |
| rs7611991 | [34]     | -                                            |
| rs762421  | [1]      | [4]                                          |
| rs7712957 | [34]     | -                                            |

|           |          |               |
|-----------|----------|---------------|
| rs7746082 | [1]      | -             |
| rs7807268 | [23]     | -             |
| rs7868736 | [20]     | -             |
| rs7869487 | [23, 88] | [25, 89]      |
| rs7927894 | [1]      | [4, 90]       |
| rs8050910 | [53]     | -             |
| rs8111071 | [23]     | -             |
| rs8176785 | [20]     | -             |
| rs830772  | [20]     | -             |
| rs842647  | [11]     | [91]          |
| rs880324  | [23]     | -             |
| rs916977  | [23]     | [24-25]       |
| rs917997  | [11]     | [1, 4, 92-93] |
| rs9292777 | [23]     | [24-26]       |
| rs946227  | [23]     | -             |
| rs9858542 | [23]     | [25-26, 94]   |
| rs9870678 | [23]     | -             |
| rs9895062 | [23]     | [25]          |
| rs9993022 | [23]     | -             |

In the middle column, the publication is specified, in which the association of each SNP with inflammatory bowel disease (IBD, either Crohn disease (CD) or ulcerative colitis (UC)) was first reported (initial publication). If existent, studies replicating the initial finding for IBD or reporting associations with other human diseases are listed in the right column. The corresponding references are given below this table.

1. Barrett, J.C., et al., *Genome-wide association defines more than 30 distinct susceptibility loci for Crohn's disease*. Nat Genet, 2008. **40**(8): p. 955-62.
2. Capon, F., et al., *Sequence variants in the genes for the interleukin-23 receptor (IL23R) and its ligand (IL12B) confer protection against psoriasis*. Hum Genet, 2007. **122**(2): p. 201-6.
3. Fisher, S.A., et al., *Genetic determinants of ulcerative colitis include the ECM1 locus and five loci implicated in Crohn's disease*. Nat Genet, 2008. **40**(6): p. 710-712.
4. Anderson, C.A., et al., *Investigation of Crohn's Disease Risk Loci in Ulcerative Colitis Further Defines Their Molecular Relationship*. Gastroenterology, 2009. **136**(2): p. 523-529.e3.
5. Duerr, R.H., et al., *A genome-wide association study identifies IL23R as an inflammatory bowel disease gene*. Science, 2006. **314**(5804): p. 1461-3.
6. Silverberg, M.S., et al., *Ulcerative colitis-risk loci on chromosomes 1p36 and 12q15 found by genome-wide association study*. Nat Genet, 2009. **41**(2): p. 216-220.
7. Glas, J., et al., *rs1004819 Is the Main Disease-Associated IL23R Variant in German Crohn's Disease Patients: Combined Analysis of IL23R, CARD15, and OCTN1/2 Variants*. PLoS ONE, 2007. **2**(9): p. e819.
8. Amre, D.K., et al., *Association Between Genetic Variants in the IL-23R Gene and Early-Onset Crohn's Disease: Results From a Case-Control and Family-Based Study Among Canadian Children*. Am J Gastroenterol, 2008. **103**(3): p. 615-620.
9. Baptista, M.L., et al., *CARD15 and IL23R influences Crohn's disease susceptibility but not disease phenotype in a Brazilian population*. Inflamm Bowel Dis, 2008. **14**(5): p. 674-679.
10. Yang, S.-K., et al., *Contribution of IL23R but not ATG16L1 to Crohn's disease susceptibility in Koreans*. Inflamm Bowel Dis, 2009. **15**(9): p. 1385-1390.

11. Zhernakova, A., et al., *Genetic analysis of innate immunity in Crohn's disease and ulcerative colitis identifies two susceptibility loci harboring CARD9 and IL18RAP*. *Am J Hum Genet*, 2008. **82**(5): p. 1202-10.
12. Peltekova, V.D., et al., *Functional variants of OCTN cation transporter genes are associated with Crohn disease*. *Nat Genet*, 2004. **36**(5): p. 471-5.
13. Russell, R.K., et al., *Analysis of the influence of OCTN1/2 variants within the IBD5 locus on disease susceptibility and growth indices in early onset inflammatory bowel disease*. *Gut*, 2006. **55**(8): p. 1114-23.
14. Török, H.P., et al., *Polymorphisms in the DLG5 and OCTN cation transporter genes in Crohn's disease*. *Gut*, 2005. **54**(10): p. 1421-7.
15. Waller, S., et al., *Evidence for association of OCTN genes and IBD5 with ulcerative colitis*. *Gut*, 2006. **55**(6): p. 809-14.
16. Santiago, J.L., et al., *Evidence for the association of the SLC22A4 and SLC22A5 genes with type 1 diabetes: a case control study*. *BMC Med Genet*, 2006. **7**: p. 54.
17. Hampe, J., et al., *Association between insertion mutation in NOD2 gene and Crohn's disease in German and British populations*. *Lancet*, 2001. **357**(9272): p. 1925-8.
18. Hugot, J.P., et al., *Association of NOD2 leucine-rich repeat variants with susceptibility to Crohn's disease*. *Nature*, 2001. **411**(6837): p. 599-603.
19. Ogura, Y., et al., *A frameshift mutation in NOD2 associated with susceptibility to Crohn's disease*. *Nature*, 2001. **411**(6837): p. 603-6.
20. Franke, A., et al., *Systematic association mapping identifies NELL1 as a novel IBD disease gene*. *PLoS ONE*, 2007. **2**: p. e691.
21. Villani, A.-C., et al., *Common variants in the NLRP3 region contribute to Crohn's disease susceptibility*. *Nat Genet*, 2009. **41**(1): p. 71-76.
22. Pardanani, A., et al., *Host genetic variation contributes to phenotypic diversity in myeloproliferative disorders*. *Blood*, 2008. **111**(5): p. 2785-9.
23. WTCCC, *Genome-wide association study of 14,000 cases of seven common diseases and 3,000 shared controls*. *Nature*, 2007. **447**(7145): p. 661-78.
24. Weersma, R.K., et al., *Confirmation of Multiple Crohn's Disease Susceptibility Loci in a Large Dutch-Belgian Cohort*. *Am J Gastroenterol*, 2009. **104**(3): p. 630-638.
25. Franke, A., et al., *Replication of signals from recent studies of Crohn's disease identifies previously unknown disease loci for ulcerative colitis*. *Nat Genet*, 2008. **40**(6): p. 713-5.
26. Parkes, M., et al., *Sequence variants in the autophagy gene IRGM and multiple other replicating loci contribute to Crohn's disease susceptibility*. *Nat Genet*, 2007.
27. Yamazaki, K., et al., *Positive association of genetic variants in the upstream region of NKX2-3 with Crohn's disease in Japanese patients*. *Gut*, 2009. **58**(2): p. 228-232.
28. Farago, B., et al., *Functional variants of interleukin-23 receptor gene confer risk for rheumatoid arthritis but not for systemic sclerosis*. *Ann Rheum Dis*, 2008. **67**(2): p. 248-50.
29. Huber, A.K., et al., *Interleukin (IL)-23 Receptor Is a Major Susceptibility Gene for Graves' Ophthalmopathy: The IL-23/T-helper 17 Axis Extends to Thyroid Autoimmunity*. *J Clin Endocrinol Metab*, 2008. **93**(3): p. 1077-1081.
30. Okazaki, T., et al., *Contributions of IBD5, IL23R, ATG16L1, and NOD2 to Crohn's disease risk in a population-based case-control study: evidence of gene-gene interactions*. *Inflamm Bowel Dis*, 2008. **14**(11): p. 1528-41.
31. Chen, Y., et al., *Interleukin-23 receptor gene polymorphisms is associated with dilated cardiomyopathy in Chinese Han population*. *Tissue Antigens*, 2009. **73**(4): p. 330-334.
32. WTCCC&AAASC, *Association scan of 14,500 nonsynonymous SNPs in four diseases identifies autoimmunity variants*. *Nature Genetics*, 2007. **39**(11): p. 1329-1337.
33. Tremelling, M., et al., *IL23R Variation Determines Susceptibility But Not Disease Phenotype in Inflammatory Bowel Disease*. *Gastroenterology*, 2007. **132**(5): p. 1657-1664.
34. Franke, A., et al., *Sequence variants in IL10, ARPC2 and multiple other loci contribute to ulcerative colitis susceptibility*. *Nat Genet*, 2008. **40**(11): p. 1319-23.
35. Kilpivaara, O., et al., *A germline JAK2 SNP is associated with predisposition to the development of JAK2V617F-positive myeloproliferative neoplasms*. *Nat Genet*, 2009. **41**(4): p. 455-459.

36. Cummings, J.R., et al., *Contribution of the novel inflammatory bowel disease gene IL23R to disease susceptibility and phenotype*. *Inflamm Bowel Dis*, 2007. **13**(9): p. 1063-8.
37. Dusatkova, P., et al., *Association of IL23R p.381Gln and ATG16L1 p.197Ala With Crohn Disease in the Czech Population*. *J Pediatr Gastroenterol Nutr*, 2009. **ahead of print**.
38. Sáfrány, E., et al., *Variants of the IL23R Gene are Associated with Ankylosing Spondylitis but not with Sjögren Syndrome in Hungarian Population Samples*. *Scandinavian Journal of Immunology*, 2009. **70**(1): p. 68-74.
39. Baldassano, R.N., et al., *Association of variants of the interleukin-23 receptor gene with susceptibility to pediatric Crohn's disease*. *Clin Gastroenterol Hepatol*, 2007. **5**(8): p. 972-6.
40. Büning, C., et al., *Heterozygosity for IL23R p.Arg381Gln confers a protective effect not only against Crohn's disease but also ulcerative colitis*. *Alimentary Pharmacology & Therapeutics*, 2007. **26**(7): p. 1025-1033.
41. Roberts, R.L., et al., *IL23R R381Q and ATG16L1 T300A Are Strongly Associated With Crohn's Disease in a Study of New Zealand Caucasians With Inflammatory Bowel Disease*. *Am J Gastroenterol*, 2007. **102**(12): p. 2754-2761.
42. Weersma, R.K., et al., *ATG16L1 and IL23R Are Associated With Inflammatory Bowel Diseases but Not With Celiac Disease in The Netherlands*. *Am J Gastroenterol*, 2008. **103**(3): p. 621-627.
43. Rueda, B., et al., *The IL23R Arg381Gln non-synonymous polymorphism confers susceptibility to ankylosing spondylitis*. *Ann Rheum Dis*, 2008. **67**(10): p. 1451-4.
44. Nair, R.P., et al., *Polymorphisms of the IL12B and IL23R Genes Are Associated with Psoriasis*. *J Invest Dermatol*, 2008. **128**(7): p. 1653-1661.
45. Liu, Y., et al., *A Genome-Wide Association Study of Psoriasis and Psoriatic Arthritis Identifies New Disease Loci*. *PLoS Genetics*, 2008. **4**(3): p. e1000041.
46. Rahman, P., et al., *Association of interleukin-23 receptor variants with ankylosing spondylitis*. *Arthritis Rheum*, 2008. **58**(4): p. 1020-5.
47. Márquez, A., et al., *IL23R and IL12B polymorphisms in spanish IBD patients: No evidence of interaction*. *Inflamm Bowel Dis*, 2008. **14**(9): p. 1192-1196.
48. Latiano, A., et al., *Replication of interleukin 23 receptor and autophagy-related 16-like 1 association in adult- and pediatric-onset inflammatory bowel disease in Italy*. *World J Gastroenterol*, 2008. **14**(29): p. 4643-51.
49. Karaderi, T., et al., *Association between the interleukin 23 receptor and ankylosing spondylitis is confirmed by a new UK case-control study and meta-analysis of published series*. *Rheumatology (Oxford)*, 2009. **48**(4): p. 386-9.
50. Glas, J., et al., *The ATG16L1 Gene Variants rs2241879 and rs2241880 (T300A) Are Strongly Associated With Susceptibility to Crohn's Disease in the German Population*. *Am J Gastroenterol*, 2008. **103**(3): p. 682-691.
51. Libioulle, C., et al., *Novel Crohn Disease Locus Identified by Genome-Wide Association Maps to a Gene Desert on 5p13.1 and Modulates Expression of PTGER4*. *PLoS Genet*, 2007. **3**(4): p. e58.
52. Einarsdottir, E., et al., *IL23R in the Swedish, Finnish, Hungarian and Italian populations: association with IBD and psoriasis, and linkage to celiac disease*. *BMC Medical Genetics*, 2009. **10**(1): p. 8.
53. Rioux, J.D., et al., *Genome-wide association study identifies new susceptibility loci for Crohn disease and implicates autophagy in disease pathogenesis*. *Nat Genet*, 2007. **39**(5): p. 596-604.
54. Wolf, N., et al., *Psoriasis is associated with pleiotropic susceptibility loci identified in type II diabetes and Crohn disease*. *J Med Genet*, 2008. **45**(2): p. 114-116.
55. Stoll, M., et al., *Genetic variation in DLG5 is associated with inflammatory bowel disease*. *Nat Genet*, 2004. **36**(5): p. 476-80.
56. Roberts, R.L., et al., *Confirmation of association of IRGM and NCF4 with ileal Crohn's disease in a population-based cohort*. *Genes Immun*, 2008. **9**(6): p. 561-565.
57. Palomino-Morales, R.J., et al., *Association of ATG16L1 and IRGM genes polymorphisms with inflammatory bowel disease: a meta-analysis approach*. *Genes Immun*, 2009. **10**(4): p. 356-364.
58. Lees, C.W., et al., *Analysis of Germline GLII Variation Implicates Hedgehog Signalling in the Regulation of Intestinal Inflammatory Pathways*. *PLoS Med*, 2008. **5**(12): p. e239.
59. Hampe, J., et al., *A genome-wide association scan of nonsynonymous SNPs identifies a susceptibility variant for Crohn disease in ATG16L1*. *Nat Genet*, 2007. **39**(2): p. 207-211.

60. Lacher, M., et al., *Autophagy 16-like 1 rs2241880 G allele is associated with Crohn's disease in German children*. *Acta Pædiatrica*, 2009. **98**(11): p. 1835-1840.
61. Márquez, A., et al., *Role of ATG16L1 Thr300Ala polymorphism in inflammatory bowel disease: A Study in the Spanish population and a meta-analysis*. *Inflamm Bowel Dis*, 2009. **9999**(9999): p. NA.
62. Amre, D.K., et al., *Autophagy gene ATG16L1 but not IRGM is associated with Crohn's disease in Canadian children*. *Inflamm Bowel Dis*, 2009. **15**(4): p. 501-507.
63. Lakatos, P.L., et al., *ATG16L1 and IL23 receptor (IL23R) genes are associated with disease susceptibility in Hungarian CD patients*. *Digestive and Liver Disease*, 2008. **40**(11): p. 867-873.
64. Limbergen, J.V., et al., *Autophagy gene ATG16L1 influences susceptibility and disease location but not childhood-onset in Crohn's disease in Northern Europe*. *Inflamm Bowel Dis*, 2008. **14**(3): p. 338-346.
65. Prescott, N.J., et al., *A Nonsynonymous SNP in ATG16L1 Predisposes to Ileal Crohn's Disease and Is Independent of CARD15 and IBD5*. *Gastroenterology*, 2007. **132**(5): p. 1665-1671.
66. Zhang, H.F., et al., *ATG16L1 T300A polymorphism and Crohn's disease susceptibility: evidence from 13,022 cases and 17,532 controls*. *Hum Genet*, 2009. **125**(5-6): p. 627-31.
67. Criswell, L.A., et al., *Analysis of families in the multiple autoimmune disease genetics consortium (MADGC) collection: the PTPN22 620W allele associates with multiple autoimmune phenotypes*. *Am J Hum Genet*, 2005. **76**(4): p. 561-71.
68. Hinks, A., et al., *Association between the PTPN22 gene and rheumatoid arthritis and juvenile idiopathic arthritis in a UK population: Further support that PTPN22 is an autoimmunity gene*. *Arthritis & Rheumatism*, 2005. **52**(6): p. 1694-1699.
69. Reddy, M.V.P.L., et al., *The R620W C//T polymorphism of the gene PTPN22 is associated with SLE independently of the association of PDCDI*. *Genes Immun*, 2005. **6**(8): p. 658-662.
70. Carlton, V.E.H., et al., *PTPN22 Genetic Variation: Evidence for Multiple Variants Associated with Rheumatoid Arthritis*. 2005. **77**(4): p. 567-581.
71. Kawasaki, E., et al., *Systematic search for single nucleotide polymorphisms in a lymphoid tyrosine phosphatase gene (PTPN22): association between a promoter polymorphism and type 1 diabetes in Asian populations*. *Am J Med Genet A*, 2006. **140**(6): p. 586-93.
72. Harrison, P., et al., *Effects of PTPN22 C1858T polymorphism on susceptibility and clinical characteristics of British Caucasian rheumatoid arthritis patients*. *Rheumatology (Oxford)*, 2006. **45**(8): p. 1009-11.
73. Heward, J.M., et al., *Association of PTPN22 haplotypes with Graves' disease*. *J Clin Endocrinol Metab*, 2007. **92**(2): p. 685-90.
74. Hinks, A., et al., *Investigation of genetic variation across the protein tyrosine phosphatase gene in patients with rheumatoid arthritis in the UK*. *Ann Rheum Dis*, 2007. **66**(5): p. 683-686.
75. Majorczyk, E., et al., *Association of PTPN22 single nucleotide polymorphism with rheumatoid arthritis but not with allergic asthma*. *Eur J Hum Genet*, 2007. **15**(10): p. 1043-1048.
76. Julia, A., et al., *Genome-wide association study of rheumatoid arthritis in the Spanish population: KLF12 as a risk locus for rheumatoid arthritis susceptibility*. *Arthritis Rheum*, 2008. **58**(8): p. 2275-86.
77. Stark, K., et al., *Association of common polymorphisms in known susceptibility genes with rheumatoid arthritis in a Slovak population using osteoarthritis patients as controls*. *Arthritis Research & Therapy*, 2009. **11**(3): p. R70.
78. Li, Y., et al., *The 5q31 variants associated with psoriasis and Crohn's disease are distinct*. *Hum Mol Genet*, 2008. **17**(19): p. 2978-85.
79. Ho, G.T., et al., *ABCB1/MDR1 gene determines susceptibility and phenotype in ulcerative colitis: discrimination of critical variants using a gene-wide haplotype tagging approach*. *Hum Mol Genet*, 2006. **15**(5): p. 797-805.
80. Martinez, A., et al., *Role of the PXR gene locus in inflammatory bowel diseases*. *Inflamm Bowel Dis*, 2007. **13**(12): p. 1484-7.
81. Huebner, C., et al., *Genetic analysis of MDR1 and inflammatory bowel disease reveals protective effect of heterozygous variants for ulcerative colitis*. *Inflamm Bowel Dis*, 2009.

82. Ostergaard, M., et al., *Cyclooxygenase-2, multidrug resistance 1, and breast cancer resistance protein gene polymorphisms and inflammatory bowel disease in the Danish population*. Scand J Gastroenterol, 2009. **44**(1): p. 65-73.
83. Filer, C., et al., *Investigation of association of the IL12B and IL23R genes with psoriatic arthritis*. Arthritis & Rheumatism, 2008. **58**(12): p. 3705-3709.
84. Huffmeier, U., et al., *Genetic Variants of the IL-23R Pathway: Association with Psoriatic Arthritis and Psoriasis Vulgaris, but No Specific Risk Factor for Arthritis*. J Invest Dermatol, 2008. **129**(2): p. 355-358.
85. Cargill, M., et al., *A large-scale genetic association study confirms IL12B and leads to the identification of IL23R as psoriasis-risk genes*. Am J Hum Genet, 2007. **80**(2): p. 273-90.
86. Quaranta, M., et al., *Differential contribution of CDKAL1 variants to psoriasis, Crohn's disease and type II diabetes*. Genes Immun, 2009.
87. Li, Y., et al., *Further Genetic Evidence for Three Psoriasis-Risk Genes: ADAM33, CDKAL1, and PTPN22*. J Invest Dermatol, 2008. **129**(3): p. 629-634.
88. Yamazaki, K., et al., *Single nucleotide polymorphisms in TNFSF15 confer susceptibility to Crohn's disease*. Hum Mol Genet, 2005. **14**(22): p. 3499-506.
89. Thiebaut, R., et al., *TNFSF15 Polymorphisms Are Associated With Susceptibility to Inflammatory Bowel Disease in a New European Cohort*. Am J Gastroenterol, 2009. **104**(2): p. 384-391.
90. Esparza-Gordillo, J., et al., *A common variant on chromosome 11q13 is associated with atopic dermatitis*. Nat Genet, 2009. **41**(5): p. 596-601.
91. Trynka, G., et al., *Coeliac disease-associated risk variants in TNFAIP3 and REL implicate altered NF-kappaB signalling*. Gut, 2009. **58**(8): p. 1078-83.
92. Koskinen, L.L., et al., *Association study of the IL18RAP locus in three European populations with coeliac disease*. Hum Mol Genet, 2009. **18**(6): p. 1148-55.
93. Hunt, K.A., et al., *Newly identified genetic risk variants for celiac disease related to the immune response*. Nat Genet, 2008. **40**(4): p. 395-402.
94. Marquez, A., et al., *Effect of BSN-MST1 locus on inflammatory bowel disease and multiple sclerosis susceptibility*. Genes Immun, 2009.



**Table S2: Results for all SNPs that were tested for association with either overall or acute or chronic sarcoidosis.**

| #  | Locus    | Variant    | chr: position | A1 | A2 | unaffected    |      | overall sarcoidosis |      |          |                  | acute sarcoidosis |      |          |                  | chronic sarcoidosis |      |          |                  |
|----|----------|------------|---------------|----|----|---------------|------|---------------------|------|----------|------------------|-------------------|------|----------|------------------|---------------------|------|----------|------------------|
|    |          |            |               |    |    | 11/12/22      | MAF  | 11/12/22            | MAF  | p        | OR [95 % CI]     | 11/12/22          | MAF  | p        | OR [95 % CI]     | 11/12/22            | MAF  | p        | OR [95 % CI]     |
| 1  | ATCL8    | rs7547331  | 1: 17963516   | C  | T  | 325/1202/1055 | 0.36 | 228/899/847         | 0.34 | 1.27E-01 | 0.93 [0.86-1.02] | 76/296/272        | 0.35 | 4.69E-01 | 0.95 [0.84-1.08] | 133/517/496         | 0.34 | 1.56E-01 | 0.93 [0.84-1.03] |
| 2  | OTUD3    | rs10753575 | 1: 20036455   | C  | T  | 440/1268/908  | 0.41 | 304/930/732         | 0.39 | 6.08E-02 | 0.92 [0.85-1.00] | 90/309/239        | 0.38 | 7.47E-02 | 0.89 [0.79-1.01] | 183/538/423         | 0.40 | 2.10E-01 | 0.94 [0.85-1.04] |
| 3  | OTUD3    | rs6426833  | 1: 20044447   | G  | A  | 604/1275/736  | 0.47 | 461/972/555         | 0.48 | 8.79E-01 | 1.01 [0.93-1.09] | 142/322/184       | 0.47 | 6.44E-01 | 0.97 [0.86-1.10] | 276/565/314         | 0.48 | 4.81E-01 | 1.04 [0.94-1.14] |
| 4  | DMRTA2   | rs2484676  | 1: 50645260   | T  | A  | 569/1239/784  | 0.46 | 415/993/581         | 0.46 | 9.81E-01 | 1.00 [0.92-1.09] | 152/317/178       | 0.48 | 1.68E-01 | 1.09 [0.96-1.23] | 220/586/351         | 0.44 | 2.24E-01 | 0.94 [0.85-1.04] |
| 5  | FAF1     | rs11205760 | 1: 50946918   | T  | C  | 331/1194/1094 | 0.35 | 213/896/884         | 0.33 | 2.32E-02 | 0.90 [0.83-0.99] | 67/295/287        | 0.33 | 1.07E-01 | 0.90 [0.79-1.02] | 133/527/499         | 0.34 | 3.04E-01 | 0.95 [0.86-1.05] |
| 6  | IL23R    | rs1004819  | 1: 67442801   | T  | C  | 193/1051/1376 | 0.27 | 159/809/1017        | 0.28 | 3.07E-01 | 1.05 [0.96-1.15] | 42/279/326        | 0.28 | 6.50E-01 | 1.03 [0.90-1.18] | 96/465/592          | 0.28 | 3.40E-01 | 1.05 [0.95-1.18] |
| 7  | IL23R    | rs11465804 | 1: 67475114   | G  | T  | 10/290/2320   | 0.06 | 3/174/1814          | 0.05 | 3.08E-03 | 0.75 [0.62-0.91] | 2/68/579          | 0.06 | 6.12E-01 | 0.93 [0.72-1.22] | 1/89/1067           | 0.04 | 3.94E-04 | 0.65 [0.51-0.83] |
| 8  | IL23R    | rs11209026 | 1: 67478546   | A  | G  | 10/325/2287   | 0.07 | 4/182/1810          | 0.05 | 2.09E-04 | 0.71 [0.59-0.85] | 3/66/581          | 0.06 | 1.69E-01 | 0.83 [0.64-1.08] | 1/96/1064           | 0.04 | 5.58E-05 | 0.63 [0.50-0.79] |
| 9  | IL23R    | rs10889677 | 1: 67497708   | A  | C  | 221/1033/1368 | 0.28 | 171/825/991         | 0.29 | 1.93E-01 | 1.06 [0.97-1.16] | 43/283/321        | 0.29 | 7.81E-01 | 1.02 [0.89-1.17] | 104/477/575         | 0.30 | 1.83E-01 | 1.08 [0.97-1.20] |
| 10 | 1p31.1   | rs4506508  | 1: 77028924   | C  | A  | 82/794/1729   | 0.18 | 78/655/1260         | 0.20 | 1.82E-02 | 1.13 [1.02-1.26] | 25/219/404        | 0.21 | 5.11E-02 | 1.16 [1.00-1.35] | 48/382/730          | 0.21 | 2.38E-02 | 1.15 [1.02-1.30] |
| 11 | PTPN22   | rs2476601  | 1: 114179091  | A  | G  | 25/531/2065   | 0.11 | 35/379/1564         | 0.11 | 6.88E-01 | 1.03 [0.90-1.17] | 10/119/514        | 0.11 | 7.78E-01 | 0.97 [0.80-1.18] | 21/226/905          | 0.12 | 4.88E-01 | 1.06 [0.91-1.23] |
| 12 | POU2F1   | rs2814036  | 1: 165494922  | A  | G  | 2/103/2505    | 0.02 | 2/78/1914           | 0.02 | 9.83E-01 | 1.00 [0.75-1.34] | 0/21/628          | 0.02 | 3.16E-01 | 0.79 [0.49-1.26] | 1/45/1114           | 0.02 | 9.46E-01 | 0.99 [0.70-1.40] |
| 13 | 1q24.3   | rs12035082 | 1: 171165000  | C  | T  | 379/1266/976  | 0.39 | 352/970/673         | 0.42 | 1.16E-03 | 1.15 [1.06-1.25] | 140/320/190       | 0.46 | 6.80E-07 | 1.36 [1.21-1.54] | 186/560/414         | 0.40 | 2.00E-01 | 1.07 [0.97-1.18] |
| 14 | 1q31.2   | rs10801047 | 1: 189825979  | A  | T  | 16/375/2132   | 0.08 | 9/255/1659          | 0.07 | 8.90E-02 | 0.87 [0.74-1.02] | 5/78/546          | 0.07 | 2.07E-01 | 0.86 [0.67-1.09] | 4/155/956           | 0.07 | 2.68E-01 | 0.90 [0.74-1.09] |
| 15 | DQ983818 | rs11584383 | 1: 199202489  | C  | T  | 199/1116/1306 | 0.29 | 187/815/988         | 0.30 | 3.00E-01 | 1.05 [0.96-1.15] | 61/250/336        | 0.29 | 9.24E-01 | 0.99 [0.87-1.14] | 106/480/572         | 0.30 | 3.79E-01 | 1.05 [0.94-1.17] |
| 16 | BC016656 | rs17419032 | 1: 199265154  | T  | C  | 181/1071/1368 | 0.27 | 161/822/1009        | 0.29 | 1.47E-01 | 1.07 [0.98-1.17] | 49/258/342        | 0.27 | 9.54E-01 | 1.00 [0.88-1.15] | 95/483/580          | 0.29 | 1.26E-01 | 1.09 [0.98-1.21] |
| 17 | IL10     | rs3024505  | 1: 205006527  | T  | C  | 84/720/1802   | 0.17 | 55/599/1328         | 0.18 | 2.88E-01 | 1.06 [0.95-1.18] | 16/204/427        | 0.18 | 3.07E-01 | 1.09 [0.93-1.27] | 35/336/780          | 0.18 | 5.26E-01 | 1.04 [0.92-1.19] |
| 18 | NLRP3    | rs4266924  | 1: 245683757  | G  | A  | 30/536/2050   | 0.11 | 26/398/1557         | 0.11 | 9.60E-01 | 1.00 [0.88-1.14] | 6/121/519         | 0.10 | 2.62E-01 | 0.89 [0.73-1.09] | 13/226/912          | 0.11 | 5.74E-01 | 0.96 [0.82-1.12] |
| 19 | NLRP3    | rs10733113 | 1: 245688980  | A  | G  | 53/662/1905   | 0.15 | 42/490/1455         | 0.14 | 7.75E-01 | 0.98 [0.87-1.11] | 7/154/486         | 0.13 | 1.24E-01 | 0.87 [0.73-1.04] | 26/286/844          | 0.15 | 9.67E-01 | 1.00 [0.87-1.15] |
| 20 | REL      | rs842647   | 2: 60972975   | G  | A  | 262/1106/1248 | 0.31 | 176/787/1029        | 0.29 | 7.79E-03 | 0.88 [0.81-0.97] | 61/253/335        | 0.29 | 1.14E-01 | 0.90 [0.79-1.03] | 103/458/597         | 0.29 | 3.05E-02 | 0.89 [0.80-0.99] |
| 21 | SEMA4F   | rs363617   | 2: 74772200   | C  | T  | 37/613/1968   | 0.13 | 28/459/1504         | 0.13 | 7.91E-01 | 0.98 [0.87-1.11] | 11/143/495        | 0.13 | 6.95E-01 | 0.96 [0.80-1.16] | 16/274/867          | 0.13 | 9.03E-01 | 1.01 [0.87-1.17] |
| 22 | IL18RAP  | rs917997   | 2: 102437000  | A  | G  | 149/990/1480  | 0.25 | 128/763/1098        | 0.26 | 2.60E-01 | 1.06 [0.96-1.16] | 41/255/353        | 0.26 | 3.05E-01 | 1.08 [0.94-1.24] | 79/442/636          | 0.26 | 2.15E-01 | 1.07 [0.96-1.20] |
| 23 | ITGB6    | rs2925757  | 2: 160809415  | C  | T  | 71/695/1825   | 0.16 | 71/565/1324         | 0.18 | 1.77E-02 | 1.14 [1.02-1.28] | 22/203/414        | 0.19 | 6.52E-03 | 1.24 [1.06-1.46] | 42/316/780          | 0.18 | 1.28E-01 | 1.11 [0.97-1.26] |
| 24 | 2q35     | rs12612347 | 2: 218765583  | A  | G  | 620/1295/706  | 0.48 | 481/1012/490        | 0.50 | 1.79E-01 | 1.06 [0.97-1.15] | 138/342/165       | 0.48 | 7.71E-01 | 0.98 [0.87-1.11] | 286/583/284         | 0.50 | 1.67E-01 | 1.07 [0.97-1.18] |
| 25 | ATG16L1  | rs3828309  | 2: 233845149  | T  | C  | 572/1329/719  | 0.47 | 391/983/613         | 0.44 | 7.99E-03 | 0.89 [0.82-0.97] | 127/333/186       | 0.45 | 2.56E-01 | 0.93 [0.82-1.05] | 229/579/350         | 0.45 | 5.19E-02 | 0.91 [0.82-1.00] |
| 26 | ATG16L1  | rs2241880  | 2: 233848107  | T  | C  | 572/1330/719  | 0.47 | 391/986/618         | 0.44 | 5.86E-03 | 0.89 [0.82-0.97] | 128/333/189       | 0.45 | 2.22E-01 | 0.93 [0.82-1.05] | 228/580/352         | 0.45 | 4.11E-02 | 0.90 [0.82-1.00] |
| 27 | BSN      | rs9858542  | 3: 49676987   | A  | G  | 215/1014/1384 | 0.28 | 169/829/989         | 0.29 | 6.75E-02 | 1.09 [0.99-1.19] | 56/266/325        | 0.29 | 2.57E-01 | 1.08 [0.95-1.24] | 99/478/579          | 0.29 | 1.52E-01 | 1.08 [0.97-1.21] |
| 28 | FLI44290 | rs9870678  | 3: 57497990   | G  | A  | 439/1334/841  | 0.42 | 336/954/702         | 0.41 | 1.49E-01 | 0.94 [0.86-1.02] | 106/299/242       | 0.39 | 6.55E-02 | 0.89 [0.79-1.01] | 195/561/404         | 0.41 | 2.84E-01 | 0.95 [0.86-1.05] |
| 29 | CADM2    | rs7611991  | 3: 85842248   | A  | G  | 174/985/1458  | 0.25 | 122/755/1088        | 0.25 | 9.58E-01 | 1.00 [0.91-1.10] | 37/244/361        | 0.25 | 6.04E-01 | 0.96 [0.84-1.11] | 74/434/631          | 0.26 | 9.41E-01 | 1.00 [0.90-1.12] |
| 30 | 3q24     | rs1462651  | 3: 149236246  | T  | C  | 70/650/1879   | 0.15 | 49/467/1473         | 0.14 | 1.83E-01 | 0.92 [0.82-1.04] | 8/144/498         | 0.12 | 8.33E-03 | 0.78 [0.65-0.94] | 39/267/849          | 0.15 | 7.69E-01 | 0.98 [0.85-1.12] |
| 31 | 4q13.1   | rs9993022  | 4: 59606282   | T  | C  | 1/142/2464    | 0.03 | 3/131/1859          | 0.03 | 6.22E-02 | 1.25 [0.99-1.59] | 1/50/599          | 0.04 | 1.94E-02 | 1.47 [1.06-2.03] | 1/70/1087           | 0.03 | 4.05E-01 | 1.13 [0.85-1.51] |
| 32 | 5p13.1   | rs4613763  | 5: 40428485   | C  | T  | 56/637/1929   | 0.14 | 33/481/1479         | 0.14 | 4.43E-01 | 0.95 [0.85-1.08] | 13/160/474        | 0.14 | 9.33E-01 | 1.01 [0.85-1.20] | 18/274/869          | 0.13 | 2.81E-01 | 0.92 [0.80-1.07] |
| 33 | 5p13.1   | rs1992662  | 5: 40429609   | C  | T  | 275/1109/1237 | 0.32 | 197/875/924         | 0.32 | 8.86E-01 | 1.01 [0.92-1.10] | 66/279/305        | 0.32 | 9.82E-01 | 1.00 [0.88-1.14] | 115/513/533         | 0.32 | 7.63E-01 | 1.02 [0.92-1.13] |
| 34 | 5p13.1   | rs17234657 | 5: 40437266   | G  | T  | 57/638/1927   | 0.14 | 33/481/1482         | 0.14 | 3.82E-01 | 0.95 [0.84-1.07] | 13/160/477        | 0.14 | 9.76E-01 | 1.00 [0.84-1.19] | 18/274/869          | 0.13 | 2.53E-01 | 0.92 [0.80-1.06] |
| 35 | 5p13.1   | rs1992660  | 5: 40450824   | G  | A  | 382/1221/1018 | 0.38 | 292/967/737         | 0.39 | 3.35E-01 | 1.04 [0.96-1.14] | 107/308/235       | 0.40 | 1.29E-01 | 1.10 [0.97-1.25] | 161/565/435         | 0.38 | 7.83E-01 | 1.01 [0.92-1.12] |
| 36 | 5p13.1   | rs9292777  | 5: 40473705   | C  | T  | 388/1214/1020 | 0.38 | 291/967/735         | 0.39 | 3.72E-01 | 1.04 [0.96-1.13] | 105/310/234       | 0.40 | 1.61E-01 | 1.09 [0.97-1.24] | 160/564/435         | 0.38 | 8.77E-01 | 1.01 [0.91-1.12] |

|    |                 |            |              |   |   |               |      |              |      |          |                  |             |      |          |                  |             |      |          |                  |
|----|-----------------|------------|--------------|---|---|---------------|------|--------------|------|----------|------------------|-------------|------|----------|------------------|-------------|------|----------|------------------|
| 37 | <i>5p13.1</i>   | rs1553575  | 5:40538689   | A | G | 308/1150/1150 | 0.34 | 227/904/842  | 0.34 | 5.77E-01 | 1.03 [0.94-1.12] | 61/287/291  | 0.32 | 2.08E-01 | 0.92 [0.81-1.05] | 140/549/462 | 0.36 | 7.01E-02 | 1.10 [0.99-1.22] |
| 38 | <i>S100Z</i>    | rs7712957  | 5:76174452   | C | T | 15/400/2206   | 0.08 | 21/370/1598  | 0.10 | 3.77E-04 | 1.29 [1.12-1.49] | 9/120/520   | 0.11 | 5.41E-03 | 1.33 [1.09-1.63] | 8/227/920   | 0.11 | 1.13E-03 | 1.32 [1.12-1.55] |
| 39 | <i>SLC22A4</i>  | rs1050152  | 5:131704219  | T | C | 433/1259/917  | 0.41 | 319/953/723  | 0.40 | 4.10E-01 | 0.97 [0.89-1.05] | 97/306/247  | 0.38 | 1.37E-01 | 0.91 [0.80-1.03] | 192/554/414 | 0.40 | 8.11E-01 | 0.99 [0.89-1.09] |
| 40 | <i>SLC22A4</i>  | rs2188962  | 5:131798704  | T | C | 416/1263/934  | 0.40 | 308/943/734  | 0.39 | 4.27E-01 | 0.97 [0.89-1.05] | 97/300/250  | 0.38 | 2.08E-01 | 0.92 [0.81-1.05] | 184/549/420 | 0.40 | 7.93E-01 | 0.99 [0.89-1.09] |
| 41 | <i>SLC22A4</i>  | rs2522057  | 5:131829846  | G | C | 459/1244/867  | 0.42 | 296/932/723  | 0.39 | 3.97E-03 | 0.88 [0.81-0.96] | 92/297/250  | 0.38 | 4.02E-03 | 0.83 [0.73-0.94] | 179/539/410 | 0.40 | 6.42E-02 | 0.91 [0.82-1.01] |
| 42 | <i>IRGM</i>     | rs13361189 | 5:150203580  | C | T | 10/349/2260   | 0.07 | 13/280/1702  | 0.08 | 2.54E-01 | 1.10 [0.94-1.28] | 4/85/560    | 0.07 | 8.80E-01 | 1.02 [0.80-1.29] | 8/163/990   | 0.08 | 3.04E-01 | 1.10 [0.92-1.33] |
| 43 | <i>IRGM</i>     | rs4958847  | 5:150219780  | A | G | 27/496/2095   | 0.11 | 33/417/1546  | 0.12 | 1.61E-02 | 1.17 [1.03-1.34] | 11/127/512  | 0.11 | 3.18E-01 | 1.10 [0.91-1.34] | 20/240/901  | 0.12 | 4.62E-02 | 1.17 [1.00-1.36] |
| 44 | <i>IRGM</i>     | rs11747270 | 5:150239060  | G | A | 10/345/2262   | 0.07 | 12/275/1702  | 0.08 | 3.19E-01 | 1.08 [0.93-1.27] | 4/85/559    | 0.07 | 7.99E-01 | 1.03 [0.81-1.31] | 7/158/991   | 0.07 | 4.68E-01 | 1.07 [0.89-1.29] |
| 45 | <i>AK097548</i> | rs1363670  | 5:158716689  | G | C | 79/776/1754   | 0.18 | 64/523/1406  | 0.16 | 4.84E-02 | 0.90 [0.80-1.00] | 23/169/458  | 0.17 | 2.49E-01 | 0.91 [0.77-1.07] | 36/302/820  | 0.16 | 6.41E-02 | 0.88 [0.77-1.01] |
| 46 | <i>IL12B</i>    | rs10045431 | 5:158747111  | A | C | 220/1060/1316 | 0.29 | 142/740/1080 | 0.26 | 3.15E-03 | 0.87 [0.79-0.95] | 39/248/354  | 0.25 | 1.36E-02 | 0.84 [0.73-0.96] | 85/426/630  | 0.26 | 1.40E-02 | 0.87 [0.78-0.97] |
| 47 | <i>IL12B</i>    | rs6887695  | 5:158755223  | C | G | 216/1031/1374 | 0.28 | 201/833/960  | 0.31 | 1.37E-03 | 1.16 [1.06-1.27] | 73/275/302  | 0.32 | 1.42E-03 | 1.24 [1.09-1.41] | 106/485/568 | 0.30 | 5.53E-02 | 1.11 [1.00-1.24] |
| 48 | <i>SLC22A23</i> | rs17309827 | 6:3378317    | G | T | 365/1280/976  | 0.38 | 302/943/748  | 0.39 | 6.48E-01 | 1.02 [0.94-1.11] | 99/305/245  | 0.39 | 7.87E-01 | 1.02 [0.90-1.15] | 173/551/435 | 0.39 | 7.71E-01 | 1.02 [0.92-1.12] |
| 49 | <i>LYRM4</i>    | rs12529198 | 6:5096246    | G | A | 12/309/2300   | 0.06 | 3/260/1733   | 0.07 | 5.48E-01 | 1.05 [0.89-1.24] | 3/85/562    | 0.07 | 3.96E-01 | 1.11 [0.87-1.41] | 0/151/1010  | 0.07 | 8.05E-01 | 1.03 [0.84-1.25] |
| 50 | <i>CDKAL1</i>   | rs6908425  | 6:20836710   | T | C | 124/858/1638  | 0.21 | 75/617/1297  | 0.19 | 3.09E-02 | 0.89 [0.81-0.99] | 23/215/411  | 0.20 | 4.28E-01 | 0.94 [0.81-1.09] | 47/344/764  | 0.19 | 3.32E-02 | 0.87 [0.77-0.99] |
| 51 | <i>6q21</i>     | rs7746082  | 6:106541962  | C | G | 205/1062/1352 | 0.28 | 178/800/1006 | 0.29 | 2.78E-01 | 1.05 [0.96-1.15] | 52/255/337  | 0.28 | 8.70E-01 | 0.99 [0.86-1.13] | 113/465/577 | 0.30 | 1.09E-01 | 1.09 [0.98-1.22] |
| 52 | <i>6q23.3</i>   | rs6927210  | 6:138117846  | T | C | 600/1294/692  | 0.48 | 456/983/539  | 0.48 | 7.62E-01 | 0.99 [0.91-1.07] | 149/319/177 | 0.48 | 8.01E-01 | 0.98 [0.87-1.11] | 264/573/313 | 0.48 | 7.79E-01 | 0.99 [0.89-1.09] |
| 53 | <i>6q23.3</i>   | rs946227   | 6:138124455  | T | C | 402/1222/991  | 0.39 | 312/895/786  | 0.38 | 5.38E-01 | 0.97 [0.89-1.06] | 97/293/260  | 0.37 | 3.97E-01 | 0.95 [0.84-1.07] | 186/515/457 | 0.38 | 7.18E-01 | 0.98 [0.89-1.09] |
| 54 | <i>FGFR10P</i>  | rs2301436  | 6:167357978  | A | G | 602/1350/665  | 0.49 | 446/996/534  | 0.48 | 3.31E-01 | 0.96 [0.88-1.04] | 159/311/176 | 0.49 | 9.42E-01 | 1.00 [0.88-1.12] | 243/598/308 | 0.47 | 1.94E-01 | 0.94 [0.85-1.03] |
| 55 | <i>7p12.2</i>   | rs1456893  | 7:50240218   | G | A | 226/1066/1327 | 0.29 | 145/792/1010 | 0.28 | 2.11E-01 | 0.94 [0.86-1.03] | 47/270/316  | 0.29 | 8.72E-01 | 0.99 [0.86-1.13] | 79/462/592  | 0.27 | 1.54E-01 | 0.92 [0.83-1.03] |
| 56 | <i>MDR1</i>     | rs3789243* | 7:87058822   | C | T | 646/1260/700  | 0.49 | 534/935/521  | 0.50 | 1.95E-01 | 1.06 [0.97-1.15] | 159/319/169 | 0.49 | 8.65E-01 | 1.01 [0.89-1.14] | 333/529/296 | 0.52 | 3.49E-02 | 1.11 [1.01-1.23] |
| 57 | <i>7q31.33</i>  | rs6947579  | 7:125320242  | G | C | 243/1076/1295 | 0.30 | 192/829/964  | 0.31 | 4.84E-01 | 1.03 [0.94-1.13] | 60/261/324  | 0.30 | 8.10E-01 | 0.98 [0.86-1.12] | 109/489/559 | 0.31 | 5.55E-01 | 1.03 [0.93-1.15] |
| 58 | <i>7q36.1</i>   | rs7807268  | 7:147888981  | G | C | 526/1327/755  | 0.46 | 408/1007/577 | 0.46 | 8.87E-01 | 1.01 [0.93-1.09] | 133/333/183 | 0.46 | 7.28E-01 | 1.02 [0.90-1.15] | 240/586/332 | 0.46 | 7.37E-01 | 1.02 [0.92-1.12] |
| 59 | <i>7q36.1</i>   | rs12704036 | 7:147889094  | T | C | 233/1150/1204 | 0.31 | 198/800/994  | 0.30 | 2.12E-01 | 0.94 [0.86-1.03] | 60/276/312  | 0.31 | 6.38E-01 | 0.97 [0.85-1.11] | 123/444/593 | 0.30 | 1.96E-01 | 0.93 [0.84-1.04] |
| 60 | <i>HNF4G</i>    | rs830772   | 8:76515133   | T | G | 69/735/1804   | 0.17 | 60/563/1349  | 0.17 | 4.64E-01 | 1.04 [0.93-1.16] | 29/178/430  | 0.19 | 1.29E-01 | 1.13 [0.96-1.33] | 30/334/788  | 0.17 | 6.98E-01 | 1.03 [0.90-1.17] |
| 61 | <i>8q24.13</i>  | rs1551398  | 8:126609233  | C | T | 372/1190/1055 | 0.37 | 273/918/795  | 0.37 | 9.27E-01 | 1.00 [0.91-1.09] | 71/310/265  | 0.35 | 1.89E-01 | 0.92 [0.81-1.04] | 168/525/463 | 0.37 | 8.10E-01 | 1.01 [0.92-1.12] |
| 62 | <i>8q24.13</i>  | rs4871612  | 8:126609769  | T | C | 88/825/1685   | 0.19 | 84/601/1276  | 0.20 | 6.82E-01 | 1.02 [0.92-1.14] | 22/201/414  | 0.19 | 9.78E-01 | 1.00 [0.85-1.17] | 55/340/748  | 0.20 | 6.72E-01 | 1.03 [0.91-1.16] |
| 63 | <i>JAK2</i>     | rs10758669 | 9:4971602    | C | A | 327/1183/1109 | 0.35 | 262/953/773  | 0.37 | 3.96E-02 | 1.09 [1.00-1.19] | 79/307/260  | 0.36 | 5.35E-01 | 1.04 [0.92-1.18] | 165/551/442 | 0.38 | 1.32E-02 | 1.14 [1.03-1.26] |
| 64 | <i>JAK2</i>     | rs10974944 | 9:5060831    | G | C | 183/1028/1397 | 0.27 | 148/832/1013 | 0.28 | 9.36E-02 | 1.08 [0.99-1.19] | 43/271/334  | 0.28 | 5.51E-01 | 1.04 [0.91-1.20] | 95/501/564  | 0.30 | 6.14E-03 | 1.16 [1.04-1.30] |
| 65 | <i>9q32</i>     | rs7868736  | 9:115568004  | T | C | 154/1028/1438 | 0.25 | 168/797/1008 | 0.29 | 5.77E-04 | 1.18 [1.07-1.29] | 52/264/329  | 0.29 | 2.64E-02 | 1.17 [1.02-1.34] | 106/446/592 | 0.29 | 3.17E-03 | 1.18 [1.06-1.32] |
| 66 | <i>TNFSF15</i>  | rs4263839  | 9:116606261  | A | G | 269/1154/1193 | 0.32 | 198/881/907  | 0.32 | 8.47E-01 | 0.99 [0.91-1.08] | 68/290/287  | 0.33 | 6.39E-01 | 1.03 [0.91-1.17] | 117/501/538 | 0.32 | 6.38E-01 | 0.98 [0.88-1.08] |
| 67 | <i>TNFSF15</i>  | rs7869487  | 9:116620735  | C | T | 258/1129/1225 | 0.31 | 196/852/939  | 0.31 | 8.49E-01 | 0.99 [0.91-1.08] | 63/284/301  | 0.32 | 9.19E-01 | 1.01 [0.88-1.15] | 118/478/558 | 0.31 | 6.33E-01 | 0.97 [0.88-1.08] |
| 68 | <i>CARD9</i>    | rs10870077 | 9:138383712  | G | C | 481/1289/844  | 0.43 | 363/969/645  | 0.43 | 8.57E-01 | 0.99 [0.91-1.08] | 116/318/208 | 0.43 | 8.86E-01 | 0.99 [0.88-1.12] | 217/560/375 | 0.43 | 9.45E-01 | 1.00 [0.91-1.11] |
| 69 | <i>10p15.1</i>  | rs6601764  | 10:3852542   | C | T | 486/1278/843  | 0.43 | 371/969/639  | 0.43 | 9.42E-01 | 1.00 [0.92-1.09] | 126/313/209 | 0.44 | 7.74E-01 | 1.02 [0.90-1.15] | 210/563/374 | 0.43 | 8.08E-01 | 0.99 [0.89-1.09] |
| 70 | <i>CCNY</i>     | rs3936503  | 10:35589263  | A | G | 270/1090/1257 | 0.31 | 205/876/906  | 0.32 | 2.13E-01 | 1.06 [0.97-1.16] | 59/299/289  | 0.32 | 4.52E-01 | 1.05 [0.92-1.20] | 119/496/540 | 0.32 | 5.85E-01 | 1.03 [0.93-1.14] |
| 71 | <i>ZNF365</i>   | rs10995271 | 10:64108492  | C | G | 384/1297/935  | 0.39 | 337/933/696  | 0.41 | 1.76E-01 | 1.06 [0.97-1.15] | 104/304/233 | 0.40 | 7.58E-01 | 1.02 [0.90-1.16] | 202/543/398 | 0.41 | 1.11E-01 | 1.09 [0.98-1.20] |
| 72 | <i>ZNF365</i>   | rs10761659 | 10:64115570  | A | G | 517/1346/758  | 0.45 | 365/999/631  | 0.43 | 4.75E-02 | 0.92 [0.85-1.00] | 126/330/194 | 0.45 | 6.81E-01 | 0.97 [0.86-1.10] | 210/569/381 | 0.43 | 2.53E-02 | 0.89 [0.81-0.99] |
| 73 | <i>10q21.2</i>  | rs224136   | 10:64140681  | T | C | 53/710/1812   | 0.16 | 42/482/1454  | 0.14 | 4.27E-02 | 0.89 [0.79-1.00] | 14/157/473  | 0.14 | 1.90E-01 | 0.89 [0.75-1.06] | 23/276/851  | 0.14 | 4.09E-02 | 0.86 [0.75-0.99] |
| 74 | <i>DLG5</i>     | rs1248696  | 10:79286611  | T | C | 32/481/2105   | 0.10 | 17/345/1619  | 0.10 | 1.83E-01 | 0.91 [0.79-1.05] | 9/100/535   | 0.09 | 1.85E-01 | 0.87 [0.70-1.07] | 7/223/922   | 0.10 | 8.73E-01 | 0.99 [0.84-1.16] |
| 75 | <i>NKX2-3</i>   | rs7081330  | 10:101264455 | G | A | 431/1305/856  | 0.42 | 322/995/673  | 0.41 | 5.50E-01 | 0.97 [0.90-1.06] | 99/337/213  | 0.41 | 7.03E-01 | 0.98 [0.86-1.11] | 195/568/393 | 0.41 | 7.67E-01 | 0.99 [0.89-1.09] |
| 76 | <i>NKX2-3</i>   | rs10883365 | 10:101277754 | G | A | 573/1320/729  | 0.47 | 434/1000/562 | 0.47 | 8.25E-01 | 0.99 [0.91-1.08] | 134/335/181 | 0.46 | 6.79E-01 | 0.97 [0.86-1.10] | 261/568/332 | 0.47 | 9.47E-01 | 1.00 [0.90-1.10] |
| 77 | <i>NELL1</i>    | rs1793004  | 11:20655505  | G | C | 174/985/1441  | 0.26 | 103/730/1152 | 0.24 | 2.37E-02 | 0.90 [0.81-0.99] | 36/256/354  | 0.25 | 8.55E-01 | 0.99 [0.86-1.14] | 61/402/694  | 0.23 | 5.54E-03 | 0.85 [0.76-0.95] |
| 78 | <i>NELL1</i>    | rs8176785  | 11:20761862  | G | A | 147/1007/1461 | 0.25 | 101/720/1163 | 0.23 | 6.88E-02 | 0.91 [0.83-1.01] | 33/237/376  | 0.23 | 2.87E-01 | 0.93 [0.80-1.07] | 64/416/674  | 0.24 | 2.24E-01 | 0.93 [0.83-1.05] |
| 79 | <i>11q13.5</i>  | rs7927894  | 11:75978964  | T | C | 370/1214/1030 | 0.37 | 277/891/819  | 0.36 | 3.18E-01 | 0.96 [0.88-1.04] | 93/296/258  | 0.37 | 9.33E-01 | 0.99 [0.88-1.13] | 160/505/491 | 0.36 | 1.60E-01 | 0.93 [0.84-1.03] |

|     |                 |             |              |   |   |               |      |              |      |                 |                  |             |      |                 |                  |             |      |                 |                  |
|-----|-----------------|-------------|--------------|---|---|---------------|------|--------------|------|-----------------|------------------|-------------|------|-----------------|------------------|-------------|------|-----------------|------------------|
| 80  | <i>LRK2</i>     | rs11175593  | 12: 38888207 | T | C | 0/98/2510     | 0.02 | 0/87/1887    | 0.02 | 2.74E-01        | 1.18 [0.88-1.58] | 0/29/611    | 0.02 | 3.70E-01        | 1.21 [0.80-1.84] | 0/48/1102   | 0.02 | 5.47E-01        | 1.11 [0.79-1.58] |
| 81  | <i>ARHGAP9</i>  | rs2228226   | 12: 56152088 | G | C | 213/1138/1242 | 0.30 | 176/817/979  | 0.30 | 5.92E-01        | 0.98 [0.89-1.07] | 66/247/330  | 0.29 | 6.31E-01        | 0.97 [0.85-1.11] | 96/484/567  | 0.29 | 5.48E-01        | 0.97 [0.87-1.08] |
| 82  | <i>12q15</i>    | rs7134599   | 12: 66786342 | A | G | 401/1270/948  | 0.40 | 292/918/762  | 0.38 | 1.52E-01        | 0.94 [0.86-1.02] | 86/315/241  | 0.38 | 2.84E-01        | 0.93 [0.82-1.06] | 180/522/446 | 0.38 | 3.50E-01        | 0.95 [0.86-1.05] |
| 83  | <i>12q15</i>    | rs1558744   | 12: 66790859 | A | G | 448/1293/878  | 0.42 | 333/948/697  | 0.41 | 3.39E-01        | 0.96 [0.88-1.04] | 103/322/222 | 0.41 | 5.19E-01        | 0.96 [0.85-1.09] | 201/543/404 | 0.41 | 6.08E-01        | 0.97 [0.88-1.08] |
| 84  | <i>C13orf31</i> | rs3764147   | 13: 43355925 | G | A | 190/972/1459  | 0.26 | 139/765/1086 | 0.26 | 6.53E-01        | 1.02 [0.93-1.12] | 44/264/342  | 0.27 | 3.45E-01        | 1.07 [0.93-1.23] | 80/433/642  | 0.26 | 9.12E-01        | 0.99 [0.89-1.11] |
| 85  | <i>12q22.2</i>  | rs11617463* | 13: 74229094 | A | C | 27/378/2165   | 0.08 | 39/290/1647  | 0.09 | 1.30E-01        | 1.12 [0.97-1.29] | 14/94/538   | 0.09 | 2.35E-01        | 1.14 [0.92-1.40] | 22/160/965  | 0.09 | 4.87E-01        | 1.06 [0.89-1.27] |
| 86  | <i>GPC5</i>     | rs1931047   | 13: 92087164 | C | T | 4/101/2501    | 0.02 | 0/75/1919    | 0.02 | 4.74E-01        | 0.90 [0.67-1.21] | 0/29/621    | 0.02 | 7.55E-01        | 1.07 [0.71-1.62] | 0/39/1120   | 0.02 | 2.38E-01        | 0.80 [0.55-1.16] |
| 87  | <i>HERC2</i>    | rs916977    | 15: 26186959 | A | G | 31/498/2093   | 0.11 | 31/475/1490  | 0.13 | <b>4.49E-05</b> | 1.30 [1.15-1.48] | 8/164/478   | 0.14 | <b>1.25E-03</b> | 1.34 [1.12-1.61] | 21/268/872  | 0.13 | <b>7.80E-04</b> | 1.29 [1.11-1.50] |
| 88  | <i>NOD2</i>     | rs10521209  | 16: 49313210 | G | T | 451/1273/894  | 0.42 | 318/1001/672 | 0.41 | 6.78E-01        | 0.98 [0.90-1.07] | 110/335/201 | 0.43 | 3.55E-01        | 1.06 [0.94-1.20] | 176/575/409 | 0.40 | 1.97E-01        | 0.94 [0.85-1.04] |
| 89  | <i>NOD2</i>     | rs2076756   | 16: 49314382 | G | A | 192/1018/1412 | 0.27 | 143/809/1025 | 0.28 | 3.06E-01        | 1.05 [0.96-1.15] | 41/266/337  | 0.27 | 8.37E-01        | 1.02 [0.88-1.16] | 86/476/588  | 0.28 | 1.96E-01        | 1.08 [0.96-1.20] |
| 90  | <i>FLJ44299</i> | rs8050910   | 16: 83696674 | G | T | 509/1281/793  | 0.45 | 349/971/654  | 0.42 | <b>3.35E-02</b> | 0.91 [0.84-0.99] | 119/313/213 | 0.43 | 2.47E-01        | 0.93 [0.82-1.05] | 207/574/365 | 0.43 | 2.63E-01        | 0.94 [0.86-1.04] |
| 91  | <i>STX8</i>     | rs9895062   | 17: 9311348  | G | A | 16/292/2293   | 0.06 | 7/219/1763   | 0.06 | 4.60E-01        | 0.94 [0.79-1.11] | 2/75/570    | 0.06 | 8.69E-01        | 0.98 [0.76-1.26] | 4/126/1028  | 0.06 | 4.59E-01        | 0.92 [0.75-1.14] |
| 92  | <i>CCL18</i>    | rs2015070   | 17: 31415896 | A | G | 38/450/2132   | 0.10 | 15/333/1626  | 0.09 | 1.76E-01        | 0.91 [0.79-1.04] | 2/86/554    | 0.07 | <b>8.80E-04</b> | 0.68 [0.54-0.85] | 10/209/929  | 0.10 | 9.32E-01        | 0.99 [0.84-1.17] |
| 93  | <i>ZBPB2</i>    | rs2872507   | 17: 35294289 | A | G | 576/1277/754  | 0.47 | 399/956/610  | 0.45 | 6.32E-02        | 0.92 [0.85-1.00] | 134/317/186 | 0.46 | 6.68E-01        | 0.97 [0.86-1.10] | 232/546/366 | 0.44 | 5.06E-02        | 0.91 [0.82-1.00] |
| 94  | <i>STAT3</i>    | rs744166    | 17: 37767727 | C | T | 425/1316/881  | 0.41 | 322/940/734  | 0.40 | 1.15E-01        | 0.93 [0.86-1.02] | 95/313/242  | 0.39 | 8.63E-02        | 0.90 [0.79-1.02] | 194/542/425 | 0.40 | 3.07E-01        | 0.95 [0.86-1.05] |
| 95  | <i>PTRF</i>     | rs12948909  | 17: 37824128 | C | A | 145/984/1484  | 0.24 | 107/727/1150 | 0.24 | 4.61E-01        | 0.96 [0.88-1.06] | 36/230/379  | 0.23 | 4.68E-01        | 0.95 [0.82-1.10] | 64/420/670  | 0.24 | 5.53E-01        | 0.97 [0.86-1.08] |
| 96  | <i>TNRC6C</i>   | rs4362447   | 17: 73545157 | T | C | 296/1097/1214 | 0.32 | 225/844/905  | 0.33 | 6.99E-01        | 1.02 [0.93-1.11] | 79/265/299  | 0.33 | 7.32E-01        | 1.02 [0.90-1.17] | 135/494/518 | 0.33 | 4.38E-01        | 1.04 [0.94-1.16] |
| 97  | <i>PTPN2</i>    | rs2542151   | 18: 12769947 | G | T | 65/700/1844   | 0.16 | 64/562/1366  | 0.17 | 7.06E-02        | 1.11 [0.99-1.24] | 15/172/462  | 0.16 | 7.61E-01        | 0.97 [0.82-1.15] | 41/339/778  | 0.18 | <b>1.45E-02</b> | 1.18 [1.03-1.34] |
| 98  | <i>RSHL1</i>    | rs8111071   | 19: 50999246 | G | A | 16/465/2128   | 0.10 | 20/333/1631  | 0.09 | 8.40E-01        | 0.99 [0.86-1.14] | 7/108/533   | 0.09 | 9.03E-01        | 0.99 [0.80-1.22] | 12/191/949  | 0.09 | 7.92E-01        | 0.98 [0.83-1.16] |
| 99  | <i>CARD8</i>    | rs10418239  | 19: 53414637 | G | C | 315/1181/1125 | 0.35 | 256/929/803  | 0.36 | 9.17E-02        | 1.08 [0.99-1.17] | 84/315/248  | 0.37 | 6.08E-02        | 1.13 [0.99-1.28] | 141/549/466 | 0.36 | 2.41E-01        | 1.06 [0.96-1.18] |
| 100 | <i>NFATC2</i>   | rs880324    | 20: 49487597 | A | G | 127/843/1642  | 0.21 | 102/678/1207 | 0.22 | 1.67E-01        | 1.07 [0.97-1.19] | 28/225/396  | 0.22 | 6.08E-01        | 1.04 [0.90-1.21] | 66/396/695  | 0.23 | 7.66E-02        | 1.11 [0.99-1.25] |
| 101 | <i>ARFRP1</i>   | rs6011040   | 20: 61807850 | A | G | 231/1123/1238 | 0.31 | 185/827/953  | 0.30 | 9.05E-01        | 0.99 [0.91-1.09] | 63/265/309  | 0.31 | 9.36E-01        | 1.01 [0.88-1.15] | 106/484/556 | 0.30 | 8.57E-01        | 0.99 [0.89-1.10] |
| 102 | <i>21q21.1</i>  | rs1736135   | 21: 15727091 | C | T | 474/1279/861  | 0.43 | 343/932/709  | 0.41 | 7.95E-02        | 0.93 [0.85-1.01] | 115/307/225 | 0.41 | 4.74E-01        | 0.96 [0.84-1.08] | 189/542/422 | 0.40 | <b>2.84E-02</b> | 0.89 [0.81-0.99] |
| 103 | <i>FLJ45139</i> | rs2836753   | 21: 39213057 | T | C | 356/1213/1029 | 0.37 | 271/920/802  | 0.37 | 7.16E-01        | 0.98 [0.90-1.07] | 81/307/261  | 0.36 | 5.41E-01        | 0.96 [0.85-1.09] | 163/532/464 | 0.37 | 9.78E-01        | 1.00 [0.90-1.11] |
| 104 | <i>FLJ45139</i> | rs2836754   | 21: 39213610 | T | C | 360/1224/1037 | 0.37 | 271/922/802  | 0.37 | 6.98E-01        | 0.98 [0.90-1.07] | 81/308/261  | 0.36 | 5.33E-01        | 0.96 [0.85-1.09] | 163/533/464 | 0.37 | 9.61E-01        | 1.00 [0.90-1.10] |
| 105 | <i>ICOSLG</i>   | rs762421    | 21: 44439989 | G | A | 414/1236/964  | 0.39 | 292/977/723  | 0.39 | 7.72E-01        | 0.99 [0.91-1.08] | 95/305/248  | 0.38 | 3.96E-01        | 0.95 [0.84-1.07] | 173/576/410 | 0.40 | 8.08E-01        | 1.01 [0.92-1.12] |
| 106 | <i>NCF4</i>     | rs4821544   | 22: 35588449 | C | T | 246/1078/1216 | 0.31 | 215/869/856  | 0.33 | <b>9.67E-03</b> | 1.13 [1.03-1.23] | 58/283/298  | 0.31 | 8.28E-01        | 1.02 [0.89-1.16] | 133/500/485 | 0.34 | <b>4.61E-03</b> | 1.17 [1.05-1.30] |

Results with nominal significance ( $p < 0.05$ ) are highlighted with dark grey boxes and significant results after Bonferroni correction for multiple testing ( $p < 0.05/321$ ) are highlighted with black boxes and printed in bold letters. All SNPs had a call rate  $>95\%$  and did not deviate from Hardy-Weinberg disequilibrium (HWE) in controls. Abbreviations: Nucleotide of the minor (A1) and major allele (A2), genotype counts (11/12/22), frequency of the minor allele (MAF), uncorrected p value from the allelic  $\chi^2$  test (p), odds ratio (OR) with 95% confidence interval (95% CI). \*markers that deviated from HWE in cases ( $p_{HWE} < 0.01$ ).
